# Supplementary material
Source: publisher figshare collection journal article supplement (https://diabetesjournals.figshare.com/articles/dataset/_/14488899)
Supplement: Supplementary file 1 [file 1]

## **Appendix: Epigenome Wide Association Study Reveals Methylation Loci Associated with Offspring Gestational Diabetes Mellitus Exposure and Maternal Methylome**

|                                                                                                                                                    |           |
|----------------------------------------------------------------------------------------------------------------------------------------------------|-----------|
| <b>Supplementary Table 1: GDM case and control study design with pregnancies group-matched by age and BMI strata</b>                               | <b>2</b>  |
| <b>Supplementary Table 2: Models used to investigate the two study hypotheses</b>                                                                  | <b>3</b>  |
| <b>Supplementary Table 3: GDM EWAS results for offspring with <math>p &lt; 0.05</math> (Full Table in EXCEL)</b>                                   | <b>4</b>  |
| <b>Supplementary Table 4: GDM EWAS results for mothers with <math>p &lt; 0.05</math> (Full table in EXCEL)</b>                                     | <b>4</b>  |
| <b>Supplementary Table 5: Details of methylation changes associated with gestational GDM exposure</b>                                              | <b>4</b>  |
| <b>Supplementary Figure 1: Probability-Probability plots for offspring EWAS</b>                                                                    | <b>5</b>  |
| <b>Supplementary Figure 2: Probability-Probability plots for mothers EWAS</b>                                                                      | <b>6</b>  |
| <b>Supplementary Figure 3: EWAS results for fixed effect GDM of the linear mixed model using both offspring and mothers' methylome as response</b> | <b>7</b>  |
| <b>Supplementary Figure 4: Ubiquitous expression of <i>TFCP2</i> in different tissues using GTEx</b>                                               | <b>8</b>  |
| <b>Supplementary Figure 6: Expression of <i>DLGAP2</i> in different tissues using GTEx</b>                                                         | <b>10</b> |
| <b>Supplementary Figure 7: Expression of <i>H3C6</i> in different tissues using GTEx</b>                                                           | <b>11</b> |
| <b>Supplementary Figure 8: Expression of <i>FAM13A</i> in different tissues using GTEx</b>                                                         | <b>12</b> |
| <b>Supplementary Figure 9: Expression of <i>UBE3C</i> in different tissues using GTEx</b>                                                          | <b>13</b> |

**Supplementary Table 1: GDM case and control study design with pregnancies group-matched by age and BMI strata**

| Characteristic            | BMI of the mother (kg/m <sup>2</sup> ) |            |            |            |            |            |
|---------------------------|----------------------------------------|------------|------------|------------|------------|------------|
|                           | ≤ 24.9                                 | ≤ 24.9     | 25.0-29.9  | 25.0-29.9  | ≥ 30.0     | ≥ 30.0     |
| Age of the mother (years) | Control                                | GDM        | Control    | GDM        | Control    | GDM        |
| < 25                      | 9 (1.7 %)                              | 9 (1.7 %)  | 9 (1.7 %)  | 9 (1.7 %)  | 7 (1.3 %)  | 7 (1.3 %)  |
| 25-30                     | 32 (6.0 %)                             | 31 (5.8 %) | 21 (3.9 %) | 21 (3.9 %) | 15 (2.8 %) | 20 (3.7 %) |
| 30-35                     | 35 (6.5 %)                             | 35 (6.5 %) | 35 (6.5 %) | 35 (6.5 %) | 10 (1.9 %) | 36 (6.7 %) |
| > 35                      | 34 (6.3 %)                             | 34 (6.3 %) | 22 (4.1 %) | 33 (6.2 %) | 9 (1.7 %)  | 28 (5.2 %) |

An equal number of controls were randomly chosen for each stratum. For older groups of women (> 30 years) with high pre-pregnancy BMI measures (≥ 30), there were insufficient numbers of women who were not affected by GDM. For these groups, all available controls were selected.

**Supplementary Table 2: Models used to investigate the two study hypotheses**

| Model                                                                                         | Question addressed                                                                                                                                                                                                                                                                                                         | Equation                                                                                                                                                                                                                                                                                                                                                                                                                                                                                                                                                                                                                                                                                                                                                                                                                                                                                                                                                                                                                                                                                |
|-----------------------------------------------------------------------------------------------|----------------------------------------------------------------------------------------------------------------------------------------------------------------------------------------------------------------------------------------------------------------------------------------------------------------------------|-----------------------------------------------------------------------------------------------------------------------------------------------------------------------------------------------------------------------------------------------------------------------------------------------------------------------------------------------------------------------------------------------------------------------------------------------------------------------------------------------------------------------------------------------------------------------------------------------------------------------------------------------------------------------------------------------------------------------------------------------------------------------------------------------------------------------------------------------------------------------------------------------------------------------------------------------------------------------------------------------------------------------------------------------------------------------------------------|
| 1. Shared epigenetic effects (limma)                                                          | Are there epigenetic effects (differentially methylated DNA array probes) that are shared between mother and offspring as a result of exposure to GDM?                                                                                                                                                                     | $M = \gamma \times \text{GDM} + \beta_0 + \beta_1 \times \text{sex} + \beta_2 \times \log(\text{birthweight}) + \beta_3 \times \text{gestationalweek} + \beta_4 \times \text{mumwtgain} + \beta_5 \times \text{Bcell} + \beta_6 \times \text{CD4T} + \beta_7 \times \text{CD8T} + \beta_8 \times \text{Gran} + \beta_9 \times \text{Mono} + \beta_{10} \times \text{NK} + \beta_{11} \times \text{nRBC} + \varepsilon$                                                                                                                                                                                                                                                                                                                                                                                                                                                                                                                                                                                                                                                                  |
| 2. Generalised model, testing for shared and specific epigenetic effects (Linear mixed model) | <p>Offspring and maternal pooled data analysis:</p> <p>Is there a shared effect of GDM on the methylome of the offspring/mother pairs?</p> <p>Does GDM exposure have a differential impact upon offspring and their mothers? Is there a difference between the methylome of the offspring compared to the mothers?</p>     | $M_{\varepsilon} = \gamma_1 \times \text{GDM} + \gamma_2 \times \text{GDM} \times \text{S} + \gamma_3 \times \text{S} + \beta_{0i} + \beta_1 \times \text{sex} + \varepsilon_i,$ <p>with S, the status of the individuals, i.e., offspring or mother</p>                                                                                                                                                                                                                                                                                                                                                                                                                                                                                                                                                                                                                                                                                                                                                                                                                                |
| 3. Offspring specific epigenetic effects (Linear regression)                                  | <p>Are there differences in methylation between offspring born to mothers with GDM compared to offspring born to mothers without GDM? Specifically, is there a direct association between offspring methylation status and GDM exposure and/or association with GDM exposure modified by the methylome of the mothers?</p> | $M^{\text{Offspring}} = \gamma \times \text{GDM} + \gamma \times \text{GDM} \times M^{\text{Mothers}} + \gamma \times M^{\text{Mothers}} + \beta_0 + \beta_1 \times \text{sex} + \beta_2 \times \log(\text{birthweight}) + \beta_3 \times \text{gestationalweek} + \beta_4 \times \text{Bcell} + \beta_5 \times \text{CD4T} + \beta_6 \times \text{CD8T} + \beta_7 \times \text{Mono} + \beta_8 \times \text{NK} + \varepsilon,$ <p>with the covariate <math>M^{\text{Mothers}}</math> above being the residuals (<math>\varepsilon</math>) from the following linear model:</p> $M^{\text{Mothers}} = \beta_0 + \beta_1 \times \text{age} + \beta_2 \times \text{BMI} + \beta_3 \times \text{mumwtgain} + \beta_4 \times \text{Bcell} + \beta_5 \times \text{CD4T} + \beta_6 \times \text{CD8T} + \beta_7 \times \text{Mono} + \beta_8 \times \text{NK} + \beta_9 \times \text{Neu} + \varepsilon.$ <p>Offspring/mother M pairs were retained for those following a distribution of <math>Q_{25}(M) - 3 \times \text{IQR}(M) \leq M \leq Q_{75}(M) + 3 \times \text{IQR}(M)</math></p> |

**Supplementary Table 3: GDM EWAS results for offspring with  $p < 0.05$  (Full Table in EXCEL)**

**Supplementary Table 4: GDM EWAS results for mothers with  $p < 0.05$  (Full table in EXCEL)**

**Supplementary Table 5: Details of methylation changes associated with gestational GDM exposure**

| Term <sup>1</sup>   | CpG ID     | Estimate (M) <sup>2</sup> | Estimate ( $\beta$ ) <sup>2</sup> | Average $\beta_{\text{value}}$ | Number of Mother/Offspring Pair <sup>3</sup> | P-Value <sup>4</sup>   | FDR                   | Relation to CpG Island | Gene             | Location in Gene |
|---------------------|------------|---------------------------|-----------------------------------|--------------------------------|----------------------------------------------|------------------------|-----------------------|------------------------|------------------|------------------|
| GDM                 | cg22790973 | $-1.56 \pm 0.271$         | $-0.00251 \pm 0.00170$            | 1.03 %                         | 401                                          | $1.90 \times 10^{-8}$  | $1.38 \times 10^{-2}$ | Island                 | <i>TFCP2</i>     | TSS1500          |
| GDM $\times$ Mother | cg22790973 | $0.528 \pm 0.0826$        | $0.0579 \pm 0.140$                | 1.03 %                         | 401                                          | $4.96 \times 10^{-10}$ | $3.59 \times 10^{-4}$ | Island                 | <i>TFCP2</i>     | TSS1500          |
| GDM $\times$ Mother | cg03456133 | $0.569 \pm 0.0949$        | $0.775 \pm 0.0762$                | 96.48 %                        | 498                                          | $4.02 \times 10^{-9}$  | $1.46 \times 10^{-3}$ | Open Sea               | —                | —                |
| GDM $\times$ Mother | cg19107264 | $0.574 \pm 0.102$         | $0.486 \pm 0.0877$                | 96.64 %                        | 502                                          | $3.05 \times 10^{-8}$  | $7.37 \times 10^{-3}$ | South Shelf            | <i>DLGAP2</i>    | Body             |
| GDM $\times$ Mother | cg23355087 | $-0.473 \pm 0.0851$       | $-0.602 \pm 0.0712$               | 95.66 %                        | 484                                          | $4.55 \times 10^{-8}$  | $8.24 \times 10^{-3}$ | Open Sea               | —                | —                |
| GDM $\times$ Mother | cg20002843 | $-0.295 \pm 0.0537$       | $-0.347 \pm 0.0616$               | 47.37 %                        | 503                                          | $6.68 \times 10^{-8}$  | $9.68 \times 10^{-3}$ | Open Sea               | <i>LOC127841</i> | Body             |
| GDM $\times$ Mother | cg24440941 | $-0.496 \pm 0.0917$       | $-0.482 \pm 0.168$                | 1.48 %                         | 492                                          | $1.03 \times 10^{-7}$  | $1.24 \times 10^{-2}$ | North Shore            | <i>H3C6</i>      | TSS1500          |
| GDM $\times$ Mother | cg17065901 | $0.600 \pm 0.113$         | $0.751 \pm 0.0722$                | 98.25 %                        | 498                                          | $1.70 \times 10^{-7}$  | $1.76 \times 10^{-2}$ | Open Sea               | <i>FAM13A</i>    | Body             |
| GDM $\times$ Mother | cg11493553 | $-0.509 \pm 0.0975$       | $-0.663 \pm 0.0944$               | 97.07 %                        | 478                                          | $2.66 \times 10^{-7}$  | $2.41 \times 10^{-2}$ | Open Sea               | <i>UBE3C</i>     | Body             |

<sup>1</sup> Variable term or interaction term from the linear regression, where "Mothers" is the methylation of the mothers as  $M_{\text{value}}$

<sup>2</sup> Linear regression coefficient plus/minus standard error on the  $M_{\text{value}}$  or  $\beta_{\text{value}}$  scale.

<sup>3</sup> Number of Mother/Offspring pair after outliers exclusion, with  $M_{\text{value}}$  greater than 3 times the interquartile range below the 25<sup>th</sup> percentile and lower than 3 times the interquartile range above the 75<sup>th</sup> percentile.

<sup>4</sup> Linear regression p-value computed on the  $M_{\text{value}}$  scale.

Supplementary Figure 1: Probability-Probability plots for offspring EWAS

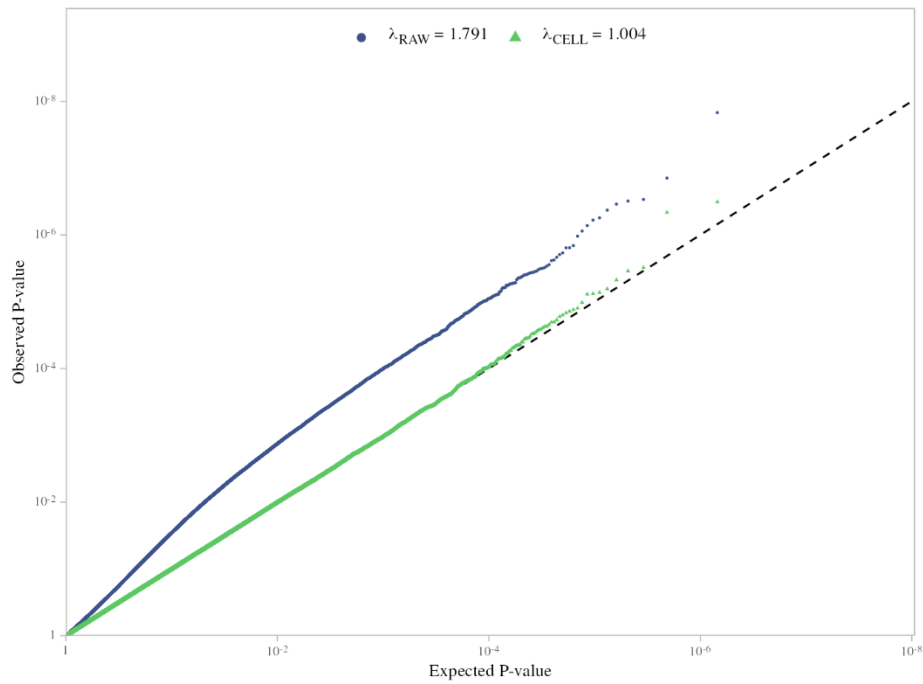

**Probability-Probability plots for offspring EWAS.** Linear regression between offspring methylation and maternal GDM exposure, adjusted for sex, gestational week, birthweight with or without cell composition.

Supplementary Figure 2: Probability-Probability plots for mothers EWAS

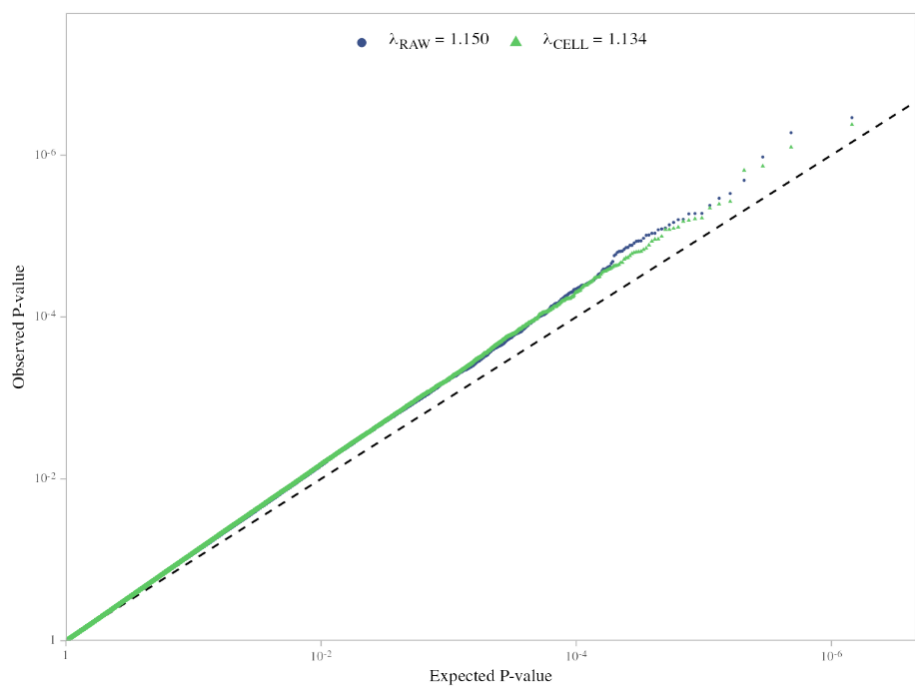

**Probability-Probability plots for mothers EWAS.** Linear regression between maternal methylation and maternal GDM exposure, adjusted for age and BMI with or without cell composition.

**Supplementary Figure 3: EWAS results for fixed effect GDM of the linear mixed model using both offspring and mothers' methylome as response**

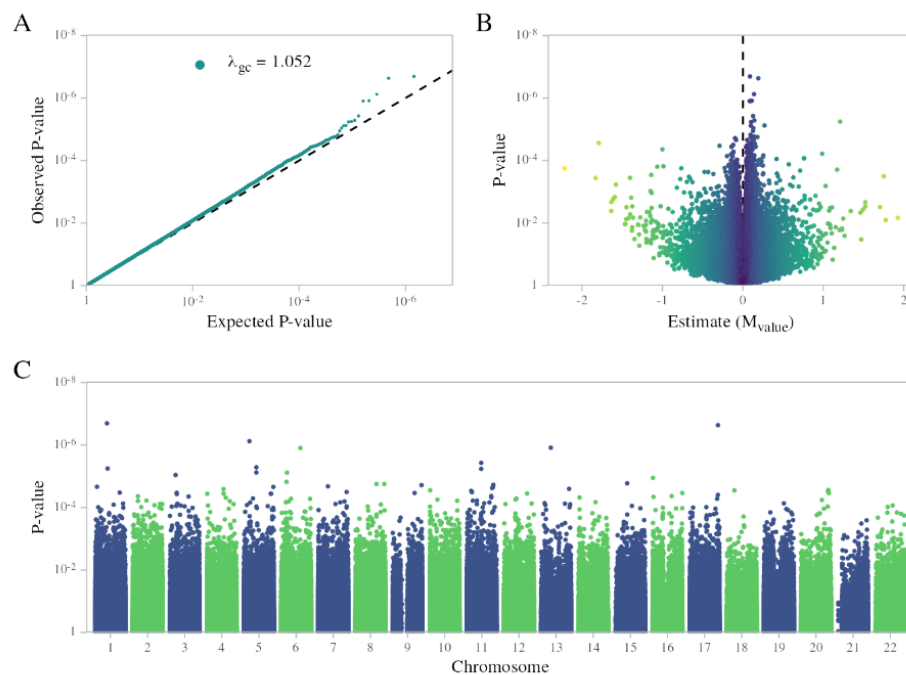

**EWAS results for fixed effect GDM of the linear mixed model using both offspring and mothers' methylome as response.** A) Probability-Probability plot of the GDM exposure fixed effect on the methylation of both offspring and mothers, with the black line indicating the expected distribution. B) A volcano plot and C) Manhattan plot, showing the genome-wide results for all the CpGs.

Supplementary Figure 4: Ubiquitous expression of *TFCP2* in different tissues using GTEx

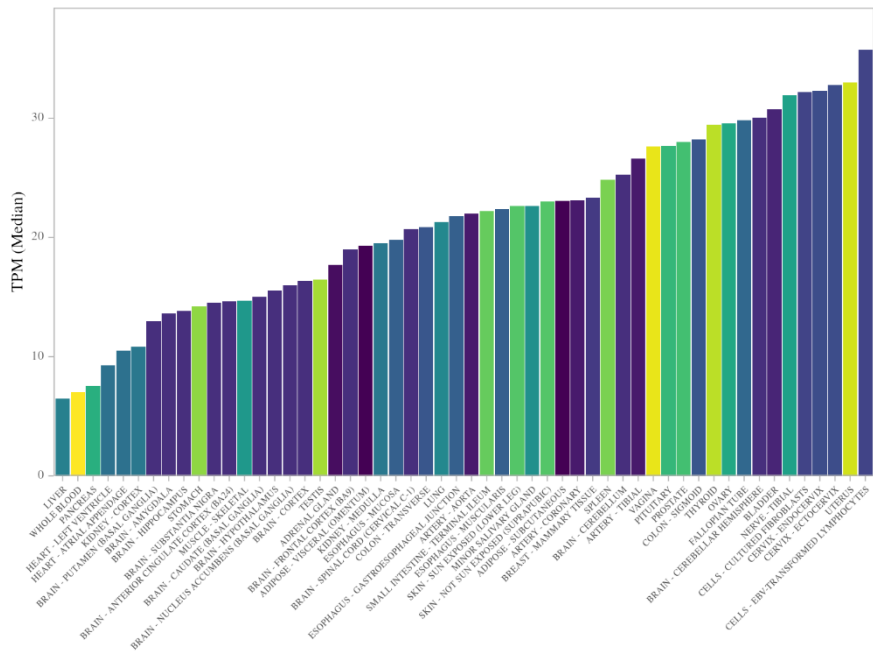

**Ubiquitous expression of *TFCP2* in different tissues using GTEx.** The global expression pattern of *TFCP2* shows a ubiquitous expression pattern.



**Supplementary Figure 5: CpGs with a GDM exposure interaction with maternal methylation on the methylation of the offspring**

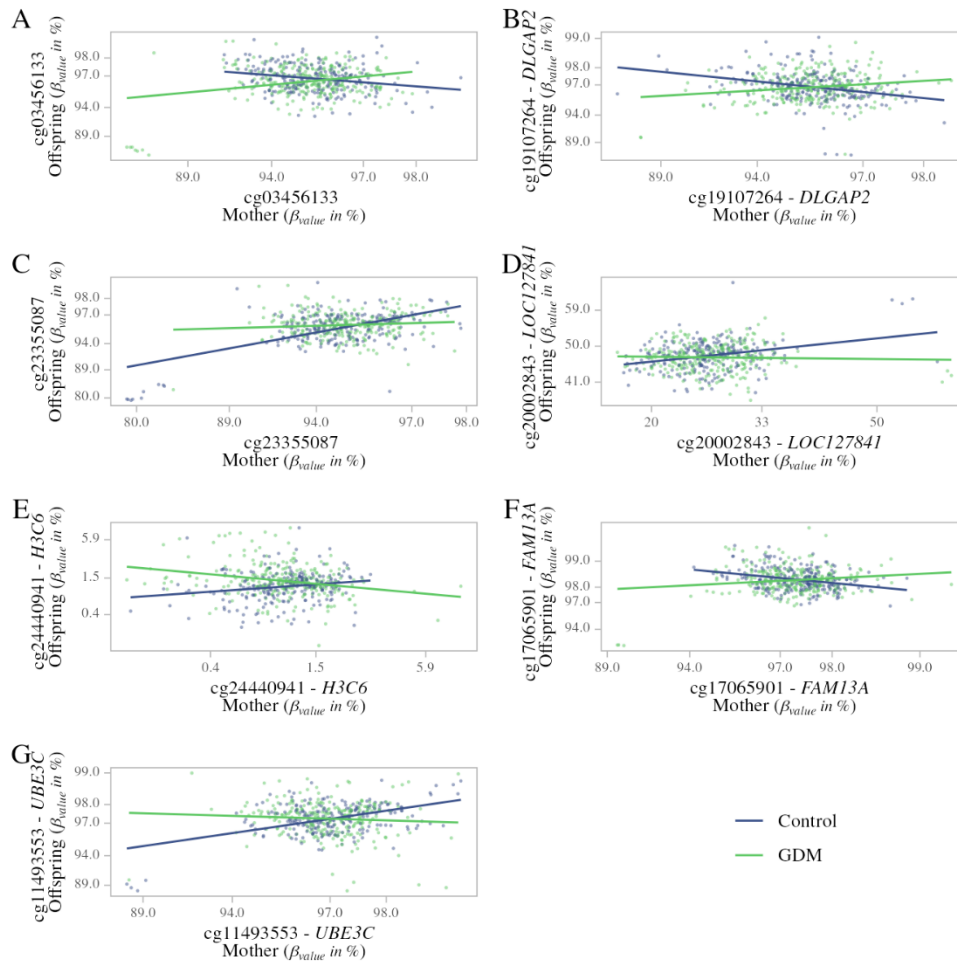

**Seven CpGs with a significant GDM exposure interaction with mother methylation on the methylation of the offspring.** Scatterplots showing the differences in methylation between offspring and mother according to the maternal GDM exposure in the A) cg03456133 located within an intergenic region, B) cg19107264 in *DLGAP2* gene, C) cg17065901 in *FAM13A* gene, D) cg2335508 located within an intergenic region and E) cg24440941 in *H3C6*, F) cg20002843 located in *LOC127841* gene body and G) cg11493553 in *UBE3C*.

**Supplementary Figure 6: Expression of *DLGAP2* in different tissues using GTEx**

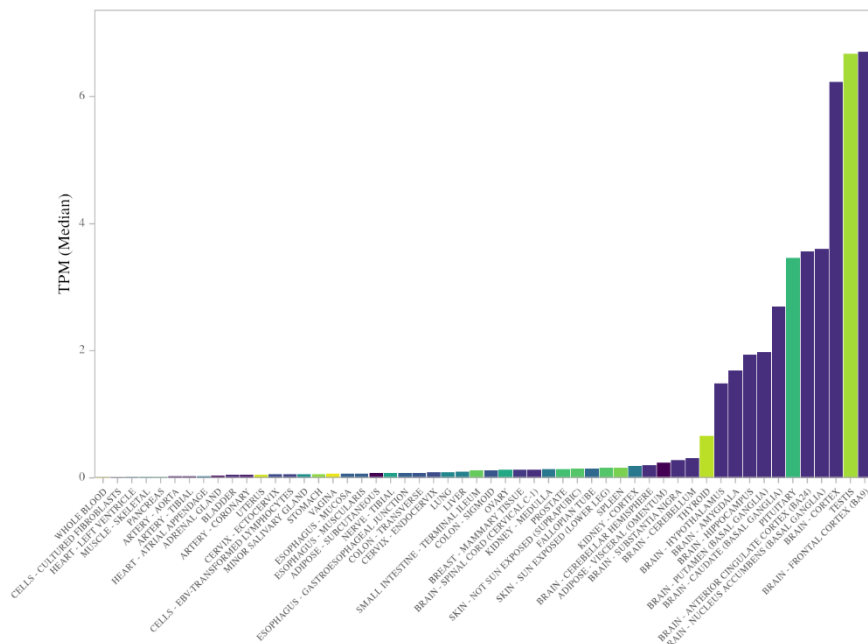

**Expression of *DLGAP2* in different tissues using GTEx.** The global expression pattern of *DLGAP2* from GTEx shows an expression pattern in brain.

**Supplementary Figure 7: Expression of *H3C6* in different tissues using GTEx**

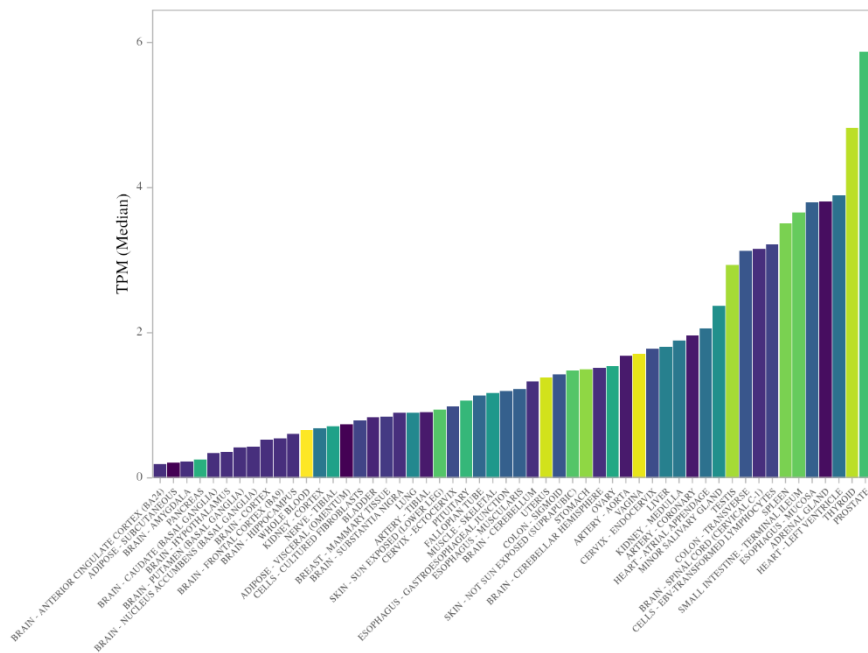

**Expression of *H3C6* in different tissues using GTEx.** The global expression pattern of *H3C6* from GTEx shows an expression pattern in brain.

**Supplementary Figure 8: Expression of *FAM13A* in different tissues using GTEx**

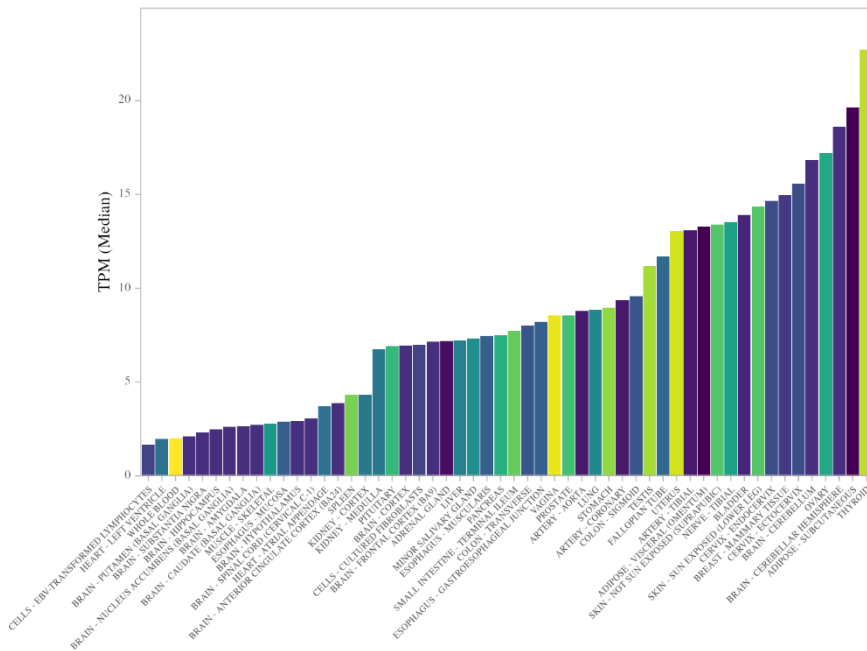

**Expression of *FAM13A* in different tissues using GTEx.** The global expression pattern of *FAM13A* from GTEx shows an expression pattern in brain.

**Supplementary Figure 9: Expression of *UBE3C* in different tissues using GTEx**

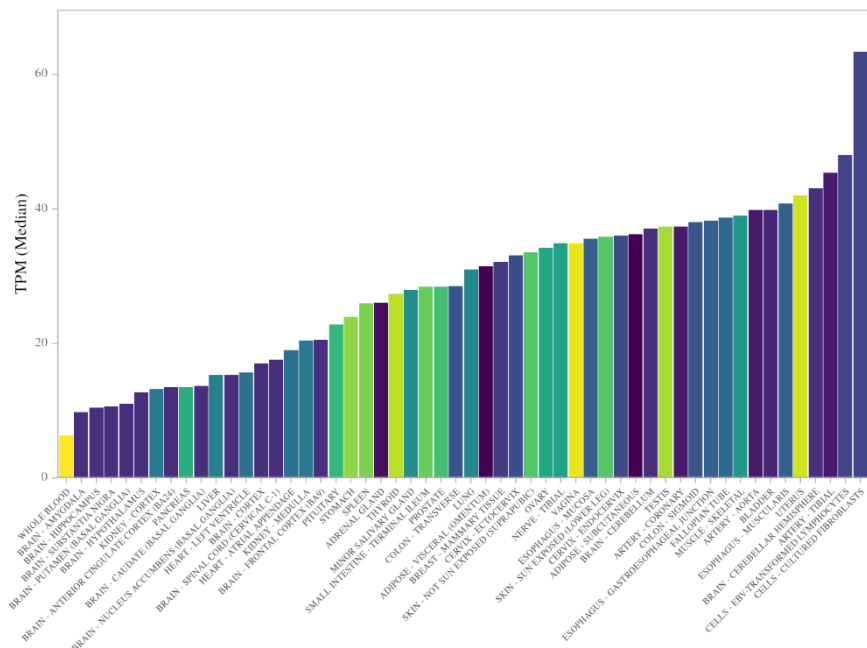

**Expression of *UBE3C* in different tissues using GTEx.** The global expression pattern of *UBE3C* from GTEx shows an expression pattern in brain.
